# Supplementary material for: Mental health in primary health care in a rural district of Cambodia: a situational analysis
Source: Springer Nature journal article supplement (doi:10.1186/s13033-018-0185-3), 2018-01-23
Supplement: MOESM1 [file 15408924]

# PRIME

**កម្មវិធីសម្រាប់ការថែទាំសុខភាពផ្លូវចិត្តឱ្យបានប្រសើរឡើង**

PRIME

Programme for improving mental health care

## **ឧបករណ៍ការវិភាគស្ថានភាព**

**អភិវឌ្ឍន៍ដោយកម្មវិធីសម្រាប់ការថែទាំសុខភាពផ្លូវចិត្តឱ្យបានប្រសើរឡើង**

Situational Analysis Tool

Developed by the Programme for Improving Mental Health Care

**កំរងសំណួរសម្រាប់មណ្ឌលថែទាំសុខភាពបឋមនីមួយៗ**

**នៅក្នុងស្រុកល្វាឯម**

Questionnaire for each Primary Health Care Center in  
Lvea Em District

# ទម្រង់សម្រាប់ការសុំអនុញ្ញាតិ

**កម្រងសំនួរនេះ** គឺត្រូវបានប្រើប្រាស់សម្រាប់គម្រោងសិក្សាពីស្ថានភាពបច្ចុប្បន្ននៃសេវាកម្ម សុខភាពផ្លូវចិត្ត នៅក្នុងស្រុកល្វាឯម។ គោលបំណងនៃគម្រោងនេះ គឺធ្វើការស្រាវជ្រាវយល់ជាបឋម/ មូលដ្ឋានសម្រាប់ការថែទាំសុខភាពផ្លូវចិត្តនៅក្នុងការថែទាំបឋម,ព័ត៌មាននេះអាចនឹងជួយ នៅក្នុងការដាក់បញ្ចូលការថែទាំសុខភាពផ្លូវចិត្ត នៅក្នុងការថែទាំសុខភាពបឋមនៅក្នុងប្រទេសកម្ពុជា។ គម្រោងនេះត្រូវបានទទួលស្គាល់ដោយមានការអនុញ្ញាតិបញ្ជាក់ពីក្រុមសីលធម៌រួចហើយ។

ទិន្នន័យនឹងត្រូវបានប្រមូលពីបុគ្គលិកធ្វើការនៅមណ្ឌលថែទាំសុខភាពបឋម នៅក្នុងស្រុក ល្វាឯម និងពីបុគ្គលិកមកពីថ្នាក់ខេត្ត និងថ្នាក់ជាតិ។ ការចូលរួមក្នុងការសិក្សាស្រាវជ្រាវនេះ គឺស្រេចលើចិត្ត។ ឈ្មោះរបស់អ្នក គឺមិនបានប្រើប្រាស់ នៅក្នុងរបាយការណ៍នោះទេ។

យើងខ្ញុំសូមថ្លែងអំណរគុណសម្រាប់ការចូលរួមរបស់លោកលោកស្រី ក្នុងការបំពេញកម្រង សំនួរនេះ។ ប្រសិនបើអ្នកចង់ដឹងព័ត៌មានបន្ថែម ឬមានសំណួរណាមួយ លោកអ្នក អាចទាក់ទងមកយើងខ្ញុំបាន។

ដោយក្តីគោរពរាប់អាន!

**សូហ្វីយ៉ាង អូឡូហ្វស្សិន** (sool0014@student.umu.se)

សិស្សវិជ្ជាសាស្ត្រ  
សាកលវិទ្យាល័យ អ៊ូមេរ៉ូ  
ប្រទេសស្វីយែដ

**មីហ្គែល សាន សេបាស្តៀន**  
វិទ្យាស្ថានសិក្សាពេទ្យពេទ្យា និងសុខភាពសកល  
សាកលវិទ្យាល័យអ៊ូមេរ៉ូ  
ប្រទេសស្វីយែដ

**ប៊ូមីកុមារ ជេហ្គានណាថាន់**  
មជ្ឈមណ្ឌលសុខភាពផ្លូវចិត្តកុមារ និងយុវវ័យ  
មន្ទីរពេទ្យបង្អែក ជ័យជំនះ  
ខេត្តកណ្តាល កម្ពុជា  
ទូរស័ព្ទ: 023 983 348, 012 482 854

[bhoomikumar.jegannathan@caritascambodia.org](mailto:bhoomikumar.jegannathan@caritascambodia.org)

**ផ្នែកទី III: គ្របដណ្តប់ការព្យាបាលសុខភាពផ្លូវចិត្ត**

**SECTION III: Mental health treatment coverage**

|           |                                                                                                                                                                                               | <b>ស្ថានភាពដំបូង Baseline situation</b>               |  |  |
|-----------|-----------------------------------------------------------------------------------------------------------------------------------------------------------------------------------------------|-------------------------------------------------------|--|--|
|           |                                                                                                                                                                                               | <b>មណ្ឌលថែទាំសុខភាពបឋម Primary Health Care Center</b> |  |  |
| <b>2.</b> | <b>ចំនួនអ្នកជំងឺដែលមករកសេវាកាលពីឆ្នាំមុន<br/>NUMBER OF PEOPLE WITH THE DISORDER IN THE<br/>CONTACT WITH SERVICES IN THE LAST YEAR</b>                                                         |                                                       |  |  |
| 2.1       | ជំងឺធ្លាក់ទឹកចិត្ត Depression                                                                                                                                                                 |                                                       |  |  |
| 2.2       | ជំងឺថប់បារម្ភ Anxiety                                                                                                                                                                         |                                                       |  |  |
| 2.3       | បញ្ហាគេង Sleep problem                                                                                                                                                                        |                                                       |  |  |
| 2.4       | បញ្ហាសុរា Alcohol problem                                                                                                                                                                     |                                                       |  |  |
| 2.5       | វិបល្លាស រីកលចរិតស្រួចស្រាវ<br>Acute psychotic disorder                                                                                                                                       |                                                       |  |  |
| 2.6       | វិបល្លាស រីកលចរិត រ៉ាំរ៉ៃ Chronic psychotic disorder                                                                                                                                          |                                                       |  |  |
| 2.7       | ជំងឺប្រកាច់ Epilepsy                                                                                                                                                                          |                                                       |  |  |
| 2.8       | កុមារដែលមានការអភិវឌ្ឍន៍យឺតយ៉ាវ<br>Children with development delay                                                                                                                             |                                                       |  |  |
| 2.9       | កុមារដែលមានបញ្ហាអាក្បកិរិយា<br>Children with behaviour problems                                                                                                                               |                                                       |  |  |
| <b>3.</b> | <b>គ្របដណ្តប់ការព្យាបាល<br/>TREATMENT COVERAGE<br/>ចំនួនអ្នកជំងឺដែលមករកសេវា/ប៉ាន់ប្រមាណអត្រា<br/>ភាគរយ Number of people with disorder in contact<br/>with services / estimated prevalence</b> |                                                       |  |  |
| 3.1       | ជំងឺធ្លាក់ទឹកចិត្ត Depression                                                                                                                                                                 |                                                       |  |  |
| 3.2       | ជំងឺថប់បារម្ភ Anxiety                                                                                                                                                                         |                                                       |  |  |
| 3.3       | បញ្ហាគេង Sleep problem                                                                                                                                                                        |                                                       |  |  |
| 3.4       | បញ្ហាសុរា Alcohol problem                                                                                                                                                                     |                                                       |  |  |
| 3.5       | វិបល្លាស រីកលចរិតស្រួចស្រាវ<br>Acute psychotic disorder                                                                                                                                       |                                                       |  |  |
| 3.6       | វិបល្លាស រីកលចរិត រ៉ាំរ៉ៃ Chronic psychotic disorder                                                                                                                                          |                                                       |  |  |
| 3.7       | ជំងឺប្រកាច់ Epilepsy                                                                                                                                                                          |                                                       |  |  |
| 3.8       | កុមារដែលមានការអភិវឌ្ឍន៍យឺតយ៉ាវ<br>Children with development delay                                                                                                                             |                                                       |  |  |
| 3.9       | កុមារដែលមានបញ្ហាអាក្បកិរិយា<br>Children with behaviour problems                                                                                                                               |                                                       |  |  |

**ផ្នែកទី IV: សេវាសុខភាពនៅកម្រិតស្រុក**

**SECTION IV: DISTRICT LEVEL HEALTH SERVICES**

|     |                                                                                                                                                                                                                                                                                                                               | ស្ថានភាពដំបូង Baseline situation          |                                         |                                       |
|-----|-------------------------------------------------------------------------------------------------------------------------------------------------------------------------------------------------------------------------------------------------------------------------------------------------------------------------------|-------------------------------------------|-----------------------------------------|---------------------------------------|
| 1   | <b>រចនាសម្ព័ន្ធរដ្ឋបាលសម្រាប់សេវាកម្មសុខភាព ADMINISTRATIVE STRUCTURES FOR HEALTH SERVICE</b>                                                                                                                                                                                                                                  |                                           |                                         |                                       |
| 1.2 | តើអ្នកប្រើសេវាកម្ម បានចូលរួមចំណែកកំរិតណា ក្នុងដំនើរការ/អភិវឌ្ឍន៍សេវាកម្ម?<br>How much involvement of service users in service running / development?                                                                                                                                                                          | ការចូលរួមចំណែក ពេញលេញ<br>Full involvement | ការចូលរួម ចំណែកខ្លះៗ<br>Somewhat        | មិនបានចូលរួម ចំណែក<br>Not at all      |
| 2   | <b>ធនធានមនុស្សដែលមាន AVAILABLE HUMAN RESOURCES</b>                                                                                                                                                                                                                                                                            |                                           |                                         |                                       |
| 2.1 | <b>បុគ្គលិកសុខភាពទូទៅនៅឯមណ្ឌលថែទាំសុខភាព</b><br>General health workers at the care center                                                                                                                                                                                                                                     |                                           | <b>មិនបំពេញមុខការ</b><br>Unfilled posts | <b>មានបំពេញមុខការ</b><br>Filled posts |
|     | ឆ្មប់ Midwives                                                                                                                                                                                                                                                                                                                |                                           |                                         |                                       |
|     | គិលានុប្បដ្ឋាកម្មធម្ម ម Degree nurses                                                                                                                                                                                                                                                                                         |                                           |                                         |                                       |
|     | គិលានុប្បដ្ឋាកម្មបឋម Diploma nurses                                                                                                                                                                                                                                                                                           |                                           |                                         |                                       |
|     | ឱសថការី Pharmacists                                                                                                                                                                                                                                                                                                           |                                           |                                         |                                       |
|     | ភ្នាក់ងារសុខភាពតាមសហគមន៍ Community health agents                                                                                                                                                                                                                                                                              |                                           |                                         |                                       |
|     | បុគ្គលិកកិច្ចសន្យាសុខភាព (បុគ្គលិកសុខភាពសហគមន៍ទទួលបានប្រាក់កំរៃ)<br>Health extension workers (paid community health workers)                                                                                                                                                                                                  |                                           |                                         |                                       |
|     | បុគ្គលិកគាំទ្រសេវាពន្យាកំណើត<br>Family planning support workers                                                                                                                                                                                                                                                               |                                           |                                         |                                       |
|     | បុគ្គលិកគ្រប់គ្រងករណីជំងឺអេដស៍ Case managers (ART)                                                                                                                                                                                                                                                                            |                                           |                                         |                                       |
|     | បុគ្គលិកបរិស្ថាន Environmental health                                                                                                                                                                                                                                                                                         |                                           |                                         |                                       |
|     | បុគ្គលិកសុខភាពទូទៅ Lay health workers                                                                                                                                                                                                                                                                                         |                                           |                                         |                                       |
|     | ឆ្មប់បុរាណ (បានបណ្តុះបណ្តាល)<br>Traditional birth attendants (TBAs) (trained)                                                                                                                                                                                                                                                 |                                           |                                         |                                       |
|     | ឆ្មប់បុរាណ (មិនបានបណ្តុះបណ្តាល) TBAs (untrained)                                                                                                                                                                                                                                                                              |                                           |                                         |                                       |
|     | ផ្សេងៗទៀត Other                                                                                                                                                                                                                                                                                                               |                                           |                                         |                                       |
| 2.2 | <b>បុគ្គលិកឯកទេសសុខភាពផ្លូវចិត្ត/ប្រព័ន្ធប្រសាទ/ការប្រើប្រាស់សារធាតុញៀន</b><br>Specialist mental health / neurology / substance misuse workers                                                                                                                                                                                |                                           |                                         |                                       |
|     | តើលោកអ្នកមានបុគ្គលិកសម្រាប់ព្យាបាលអ្នកជំងឺផ្លូវចិត្តដែរឬទេ? (ឧ: វេជ្ជបណ្ឌិតជំនាញប្រព័ន្ធប្រសាទ, វេជ្ជបណ្ឌិតឯកទេសរិកលវិទ្យា, គិលានុប្បដ្ឋាកឯកទេសរិកលវិទ្យា, អ្នកចិត្តវិទ្យា, អ្នកចិត្តវិទ្យា)<br>Do you have any workers for mental health disorders (for example neurologist, psychiatrist, psychiatric nurse, psychologist)? |                                           | <b>បាទ/ចាស</b><br>Yes                   | <b>ទេ</b><br>No                       |
|     | បើមាន តើបុគ្គលិកជំនាញប្រភេទណា?<br>If any, what kind of workers?                                                                                                                                                                                                                                                               |                                           |                                         |                                       |

|     |                                                                                                                                                                                                                                                                  |                                   |                                 |                               |
|-----|------------------------------------------------------------------------------------------------------------------------------------------------------------------------------------------------------------------------------------------------------------------|-----------------------------------|---------------------------------|-------------------------------|
| 3   | <b>ការថែទាំអ្នកជំងឺស្នាក់នៅ</b><br><b>AVAILABLE IN-PATIENT CARE</b>                                                                                                                                                                                              |                                   |                                 |                               |
| 3.1 | <b>ការថែទាំអ្នកជំងឺស្នាក់នៅ សម្រាប់ការថែទាំសុខភាពទូទៅ</b><br><b>Available in-patient care for general health care</b>                                                                                                                                            | <b>មនុស្សចាស់</b><br><b>Adult</b> | <b>កុមារ</b><br><b>Children</b> | <b>សរុប</b><br><b>Overall</b> |
|     | នៅឯមណ្ឌលសុខភាព At the health center                                                                                                                                                                                                                              |                                   |                                 |                               |
|     | ប្រសិនបើគ្មាន តើកន្លែងណាដែលនៅជិតជាងគេ<br>សម្រាប់អ្នកជំងឺស្នាក់នៅ?<br>If none, where is nearest general in-patient facility?                                                                                                                                      |                                   |                                 |                               |
|     | នៅឆ្ងាយប៉ុន្មាន? How far away?                                                                                                                                                                                                                                   |                                   |                                 |                               |
|     | តើមានផ្តល់សេវាបន្ស្រាបសុរា<br>នៅមណ្ឌលសុខភាពដែរឬទេ?<br>Is alcohol detoxification offered at the health center?                                                                                                                                                    | <b>បាទ/ចាស</b><br><b>Yes</b>      | <b>ទេ</b><br><b>No</b>          |                               |
| 3.2 | <b>ការថែទាំអ្នកជំងឺស្នាក់នៅ សម្រាប់ការថែទាំសុខភាពផ្លូវចិត្ត</b><br><b>Available in-patient care for mental health care</b>                                                                                                                                       | <b>មនុស្សចាស់</b><br><b>Adult</b> | <b>កុមារ</b><br><b>Children</b> | <b>សរុប</b><br><b>Overall</b> |
|     | នៅឯមណ្ឌលសុខភាព At the health center                                                                                                                                                                                                                              |                                   |                                 |                               |
|     | ប្រសិនបើគ្មាន តើកន្លែងណាដែលនៅជិតជាងគេ<br>សម្រាប់អ្នកជំងឺស្នាក់នៅ?<br>If none, where is nearest mental health in-patient facility?                                                                                                                                |                                   |                                 |                               |
|     | នៅឆ្ងាយប៉ុន្មាន? How far away?                                                                                                                                                                                                                                   |                                   |                                 |                               |
|     | តើកន្លែងណាដែលនៅជិតជាងគេ សម្រាប់អ្នកជំងឺ<br>ញៀនសុរា ស្នាក់ព្យាបាល?<br>Where is the nearest specialist in-patient facility for alcohol<br>abuse?                                                                                                                   |                                   |                                 |                               |
| 4   | <b>ការថែទាំសុខភាពបឋម</b><br><b>PRIMARY HEALTH CARE</b>                                                                                                                                                                                                           |                                   |                                 |                               |
| 4.2 | <b>ជាទូទៅ តើប្រជាជនត្រូវធ្វើដំណើរប៉ុន្មានគីឡូម៉ែត្រ ដើម្បី<br/>         ទៅរកសេវានៅមណ្ឌលថែទាំសុខភាព?<br/>         (គិតជា គីឡូម៉ែត្រ)</b><br><b>Typically, how far do people have to travel to access the<br/>         primary health care center? (kilometer)</b> |                                   |                                 |                               |
| 4.3 | <b>មុខងារ និងគ្របដណ្តប់ប្រជាជន ដោយមណ្ឌលថែទាំ<br/>         សុខភាព</b> <b>Function and population covered by the primary<br/>         health care center?</b>                                                                                                      |                                   |                                 |                               |
|     | មុខងារ? Function?                                                                                                                                                                                                                                                |                                   |                                 |                               |
|     | គ្របដណ្តប់ចំនួនប្រជាជនប៉ុន្មាន? Population covered?                                                                                                                                                                                                              |                                   |                                 |                               |
| 5   | <b>ការថែទាំសុខភាពតាមសហគមន៍</b> <b>COMMUNITY HEALTH CARE</b>                                                                                                                                                                                                      |                                   |                                 |                               |
| 5.1 | <b>តើមានបុគ្គលិកសុខភាពតាមសហគមន៍ទទួលបានប្រាក់កម្រៃដែរឬទេ?</b><br><b>Are there any paid community health workers?</b>                                                                                                                                              |                                   |                                 |                               |
|     | តើមានប៉ុន្មានគ្រួសារ ដែលពួកគាត់ផ្តល់សេវា?<br>How many families do they serve?                                                                                                                                                                                    |                                   |                                 |                               |
|     | តើពួកគាត់មានតួនាទីអ្វីខ្លះ? What is their role?                                                                                                                                                                                                                  |                                   |                                 |                               |

|     |                                                                                                                                                                                                                                                                               |  |
|-----|-------------------------------------------------------------------------------------------------------------------------------------------------------------------------------------------------------------------------------------------------------------------------------|--|
|     | តើពួកគាត់ជួបអ្នកជំងឺផ្លូវចិត្តដែរឬទេ?<br>Do they meet patients with mental disorder?                                                                                                                                                                                          |  |
|     | តើពួកគាត់មានការបណ្តុះបណ្តាលកំរិតអ្វីខ្លះ?<br>What level of training do they have?                                                                                                                                                                                             |  |
| 5.2 | <b>តើមានបុគ្គលិកសុខភាពតាមសហគមន៍ដែលមិនទទួលបានប្រាក់កម្រៃដែរឬទេ?</b><br><b>Are there any unpaid community health workers?</b>                                                                                                                                                   |  |
|     | តើមានប៉ុន្មានគ្រួសារ ដែលពួកគាត់ផ្តល់សេវា?<br>How many families do they serve?                                                                                                                                                                                                 |  |
|     | តើពួកគាត់មានតួនាទីអ្វីខ្លះ? What is their role?                                                                                                                                                                                                                               |  |
|     | តើពួកគាត់ជួបអ្នកជំងឺផ្លូវចិត្តដែរឬទេ?<br>Do they meet patients with mental disorder?                                                                                                                                                                                          |  |
|     | តើពួកគាត់មានការបណ្តុះបណ្តាលកំរិតអ្វីខ្លះ?<br>What level of training do they have?                                                                                                                                                                                             |  |
| 5.3 | <b>សេវាកម្មចុះផ្ទាល់</b><br><b>Outreach services</b>                                                                                                                                                                                                                          |  |
|     | តើមានការចុះផ្ទាល់ដល់សហគមន៍ដើម្បីឱ្យអ្នកជំងឺផ្លូវចិត្តត្រឡប់មករកការថែទាំវិញដែរឬទេ ប្រសិនបើពួកគាត់ឈប់មកតាមដាន?<br>Any scope for community outreach to get patients with mental disorders back into care if they get lost to follow up?                                          |  |
| 5.4 | តើមានអ្នកជំងឺផ្លូវចិត្តដែលអត់មានផ្ទះសំបែងនៅមុំមណ្ឌលសុខភាពដែរឬទេ?<br>Any homeless mentally ill persons in the up-take area of the health center?                                                                                                                               |  |
| 6   | <b>អ្នកឯកទេសសុខភាពផ្លូវចិត្ត/ការថែទាំពិនិត្យជំងឺប្រព័ន្ធប្រសាទ</b><br><b>SPECIALIST MENTAL HEALTH / NEUROLOGICAL OUT-PATIENT CARE</b>                                                                                                                                         |  |
| 6.1 | តើកន្លែងដែលនៅជិតបំផុត មានចម្ងាយប៉ុន្មាន?<br>តើទាមទាររយៈពេលប៉ុន្មាន?<br>(រយៈពេលធ្វើដំណើរ, បើកសេវាពីម៉ោងណា)?<br>How far away is the nearest facility? How accessible (time taken, opening hours)?                                                                               |  |
| 6.2 | តើមានបុគ្គលិកណាខ្លះ ដែលនៅជិតបំផុត?<br>Who staffs the nearest facility?                                                                                                                                                                                                        |  |
| 6.3 | ពិពណ៌នាពីសេវាកម្មដែលមាននៅជិតបំផុត?<br>សេវាសម្រាប់អ្នកជំងឺស្នាក់, ពិនិត្យក្រៅ, ការព្យាបាលផ្លូវចិត្ត, ការស្តារលទ្ធភាពពលកម្មឡើងវិញ, ចុះផ្ទាល់<br>Describe services available in nearest facility?<br>In-patient, out-patient, psychological therapies, rehabilitation, outreach. |  |
| 6.4 | តើបុគ្គលិកជាវេជ្ជបណ្ឌិតឯកទេសវិកលវិទ្យា ដែលនៅជិតបំផុតមានចម្ងាយប៉ុន្មាន? How far away is nearest facility staffed by psychiatrist?                                                                                                                                              |  |
| 6.5 | តើសេវាកម្មពិនិត្យ អ្នកជំងឺញៀនសុរា ដែលនៅជិតបំផុតមានចម្ងាយប៉ុន្មាន? How far away is nearest specialist out-patient alcohol service?                                                                                                                                             |  |

|      |                                                                                                                                                                                                                                               |                           |                       |                          |
|------|-----------------------------------------------------------------------------------------------------------------------------------------------------------------------------------------------------------------------------------------------|---------------------------|-----------------------|--------------------------|
| 7    | <p>សុខភាពផ្លូវចិត្តក្នុងការថែទាំសុខភាពមតា នៅក្នុងមណ្ឌលសុខភាព<br/> MENTAL HEALTH IN MATERNAL HEALTH CARE, AT THE CARE CENTER</p>                                                                                                               |                           |                       |                          |
| 7.1  | <p>ពិពណ៌នាពីសភាពទូទៅ នៃសេវាកម្មសុខភាពមតា<br/> Describe nature of maternal health services</p>                                                                                                                                                 |                           |                       |                          |
| 7.3  | <p>សេវាកម្មសម្រាលកូន, ចម្ងាយ និងបុគ្គលិក<br/> Delivery services, distances and staffing</p>                                                                                                                                                   |                           |                       |                          |
| 7.4  | <p>តើមានការថែទាំតាមផ្ទះដែរឬទេ?<br/> នរណាជាអ្នកផ្តល់សេវាកម្ម? សម្រាប់ស្ត្រីទាំងអស់រឺ?<br/> Any home-based care? Who provides this? For all women?</p>                                                                                          |                           |                       |                          |
| 7.5  | <p>ពិពណ៌នាពីការថែទាំក្រោយសម្រាល<br/> (ទីកន្លែង/ធ្វើតាមគោលការណ៍ ពិធីការផ្សេងៗ)<br/> Describe postnatal care<br/> Location/protocols followed</p>                                                                                               |                           |                       |                          |
| 7.6  | <p>តើមានប្រព័ន្ធហិរញ្ញវត្ថុអ្វីខ្លះ សម្រាប់ការថែទាំសុខភាព<br/> មតា? (មូលនិធិសមធម៌សុខភាព)<br/> What is financing system for maternal health care? (Health<br/> Equity fund)</p>                                                                |                           |                       |                          |
| 7.7  | <p>តើមានកត្តាផ្សេងៗ ដែលពាក់ព័ន្ធនឹងការផ្តល់ការថែទាំ<br/> សុខភាពមតាដែរឬទេ?<br/> Any other relevant factors in relation to delivery of maternal<br/> health care?</p>                                                                           |                           |                       |                          |
| 7.8  | <p>តើមានការថែទាំសុខភាពផ្លូវចិត្តអ្វីខ្លះ នៅក្នុងស្រុកនេះ<br/> សម្រាប់ស្ត្រីដែលជិតសម្រាលកូន?<br/> What mental health care is provided in the district for<br/> perinatal women?</p>                                                            |                           |                       |                          |
| 7.9  | <p>ប្រសិនបើគ្មាន តើកន្លែងណាដែលនៅជិតបំផុត សម្រាប់<br/> ស្ត្រី អាចទទួលបានការថែទាំសុខភាពផ្លូវចិត្តដែលជិត<br/> សម្រាលកូន?<br/> If none, where is the nearest place that a women can obtain<br/> mental health care during perinatal period?</p>   |                           |                       |                          |
| 7.10 | <p>តើស្ត្រីប្រឈមមុខនឹងបញ្ហា/ឧបសគ្គអ្វីខ្លះកំលុងពេល<br/> មានផ្ទៃពោះ/ក្រោយពេលសម្រាល ដើម្បីទទួលបានការ<br/> ថែទាំសុខភាពផ្លូវចិត្ត?<br/> What barriers do women face in pregnancy / the postnatal<br/> period to accessing mental health care?</p> |                           |                       |                          |
| 8    | <p>ការថែទាំសុខភាពអេដស៍ នៅមណ្ឌលថែទាំសុខភាព<br/> HIV HEALTH CARE AT THE CARE CENTER</p>                                                                                                                                                         |                           |                       |                          |
|      | <p>ការថែទាំអ្នកជំងឺអេដស៍ទូទៅ<br/> General HIV care</p>                                                                                                                                                                                        | <p>ស្ត្រី<br/> Female</p> | <p>បុរស<br/> Male</p> | <p>សរុប<br/> Overall</p> |
| 8.1  | <p>ចំនួនអ្នកជំងឺអេដស៍ដែលប្រើប្រាស់សេវាកម្មក្នុង១ខែ<br/> Number of people using HIV services per month</p>                                                                                                                                     |                           |                       |                          |

|      |                                                                                                                                                                                                                                                                                                                                                                 |  |
|------|-----------------------------------------------------------------------------------------------------------------------------------------------------------------------------------------------------------------------------------------------------------------------------------------------------------------------------------------------------------------|--|
|      | <p>ពិពណ៌នាពីសភាពទូទៅនៃសេវាកម្មអេដស៍ នៅឯមណ្ឌលថែទាំសុខភាព (ទីកន្លែង, បុគ្គលិក, សេវាកម្មដែលផ្តល់អ្នកជំងឺ)</p> <p>Describe nature of HIV services at the care center (location, staffing, service offered)</p>                                                                                                                                                      |  |
| 8.2  | <p><b>ការថែទាំសុខភាពផ្លូវចិត្ត ក្នុងសេវាកម្មអេដស៍</b></p> <p><b>Mental health care in HIV services</b></p>                                                                                                                                                                                                                                                      |  |
|      | <p>តើការថែទាំសុខភាពផ្លូវចិត្តអ្វីខ្លះ ដែលបានផ្តល់នៅមណ្ឌលសុខភាពសម្រាប់អ្នកជំងឺអេដស៍?</p> <p>What mental health care is provided at the care center for PLWHA (person living with HIV/AIDS)?</p>                                                                                                                                                                  |  |
|      | <p>ប្រសិនបើគ្មាន តើកន្លែងណាដែលនៅជិតបំផុតសម្រាប់អ្នកជំងឺអេដស៍ទទួលបានការថែទាំសុខភាពផ្លូវចិត្ត?</p> <p>If none, where is the nearest place that a PLWHA can obtain mental health care?</p>                                                                                                                                                                         |  |
|      | <p>តើមានឧបសគ្គអ្វីខ្លះដែលអ្នកជំងឺអេដស៍ជួបប្រទះ ក្នុងការទទួលបានការថែទាំសុខភាពផ្លូវចិត្ត?</p> <p>What barriers do PLWHA face in accessing mental health care?</p>                                                                                                                                                                                                 |  |
| 10   | <p><b>ការបណ្តុះបណ្តាលសុខភាពផ្លូវចិត្តនៅក្នុងមណ្ឌលសុខភាពបឋម</b></p> <p><b>MENTAL HEALTH TRAINING IN PHC</b></p>                                                                                                                                                                                                                                                  |  |
| 10.1 | <p><b>ការបណ្តុះបណ្តាលមុនពេលផ្តល់សេវាកម្ម</b></p> <p><b>Pre-service training</b></p>                                                                                                                                                                                                                                                                             |  |
|      | <p>តើមានការបណ្តុះបណ្តាលមុនពេលផ្តល់សេវាកម្មអ្វីខ្លះ ពីសុខភាពផ្លូវចិត្តដល់បុគ្គលិកមណ្ឌលសុខភាពបឋម? (បញ្ជាក់ពីកំរិតសញ្ញាប័ត្របុគ្គលិក រយៈពេល និងការបណ្តុះបណ្តាលបែងចែកទ្រឹស្តី និងការអនុវត្ត)</p> <p>What pre-service training is provided in mental health for PHC workers? (specify grade of worker, duration, separating theoretical and practical training)?</p> |  |
| 10.2 | <p><b>ការបណ្តុះបណ្តាលពេលផ្តល់សេវាកម្ម</b></p> <p><b>In-service training</b></p>                                                                                                                                                                                                                                                                                 |  |
|      | <p>តើគិតលាន់ប្តូរ មណ្ឌលសុខភាពប៉ុន្មានភាគរយ បានទទួលការបណ្តុះបណ្តាលយ៉ាងហោចណាស់រយៈពេល ២ថ្ងៃ ពីសុខភាពផ្លូវចិត្ត កាលពីឆ្នាំមុន?</p> <p>What % of PHC nurses received at least 2 days of refresher training in mental health in last 1 year?</p>                                                                                                                      |  |
|      | <p>ពិពណ៌នាពីសភាពទូទៅនៃការបណ្តុះបណ្តាល, រយៈពេល, ការបណ្តុះបណ្តាលធ្វើឡើងដោយនរណា, ការបណ្តុះបណ្តាលផ្តោតទៅលើអ្វី?</p> <p>Describe nature of any training, duration, who conducted the training, focus of training</p>                                                                                                                                                 |  |



|      |                                                                                                                                                                                                                                                                                                                                          |                                                   |                                                          |                                                         |
|------|------------------------------------------------------------------------------------------------------------------------------------------------------------------------------------------------------------------------------------------------------------------------------------------------------------------------------------------|---------------------------------------------------|----------------------------------------------------------|---------------------------------------------------------|
| 11   | <b>ការព្យាបាលសុខភាពផ្លូវចិត្តនៅក្នុងមណ្ឌលសុខភាពបឋម</b><br><b>MENTAL HEALTH TREATMENTS IN PHC</b>                                                                                                                                                                                                                                         |                                                   |                                                          |                                                         |
| 11.3 | <b>ថ្នាំព្យាបាលជំងឺផ្លូវចិត្ត ដែលមាននៅមណ្ឌលសុខភាព</b><br><b>Psychotropic medication availability at the health centre</b>                                                                                                                                                                                                                | <b>ថ្នាំដែលមាន</b><br><b>Medication available</b> | <b>ផ្គត់ផ្គង់ ទៀងទាត់</b><br><b>Regularity of supply</b> | <b>បន្តការផ្គត់ផ្គង់</b><br><b>Continuity of supply</b> |
|      | ថ្នាំលេបប្រឆាំងជំងឺវិកលចរិត Antipsychotics (po)                                                                                                                                                                                                                                                                                          |                                                   |                                                          |                                                         |
|      | ថ្នាំចាក់ប្រឆាំងជំងឺវិកលចរិត Antipsychotic depot                                                                                                                                                                                                                                                                                         |                                                   |                                                          |                                                         |
|      | ថ្នាំប្រឆាំងជំងឺធ្លាក់ទឹកចិត្ត Antidepressants                                                                                                                                                                                                                                                                                           |                                                   |                                                          |                                                         |
|      | ថ្នាំ Anxiolytics                                                                                                                                                                                                                                                                                                                        |                                                   |                                                          |                                                         |
|      | ថ្នាំសម្រួលអារម្មណ៍ Mood-stabilisers                                                                                                                                                                                                                                                                                                     |                                                   |                                                          |                                                         |
|      | ថ្នាំប្រឆាំងជំងឺប្រកាច់ Antiepileptics                                                                                                                                                                                                                                                                                                   |                                                   |                                                          |                                                         |
|      | ថ្នាំផ្សេងៗទៀត Other                                                                                                                                                                                                                                                                                                                     |                                                   |                                                          |                                                         |
| 11.5 | <b>យន្តការសម្រាប់ការផ្តល់ហិរញ្ញប្បទានថ្នាំ ប្រឆាំងជំងឺ វិកលចរិត (ឧ: បង់លុយ, ធានារ៉ាប់រង, អត់បង់លុយ, បង់សងជំនួស)</b><br><b>Mechanisms for psychotropic medication financing (e.g. out-of-pocket, insurance, waiver schemes, reimbursement)</b>                                                                                            |                                                   |                                                          |                                                         |
| 11.6 | <b>មិនគិតថ្លៃថ្នាំទាំងស្រុង តើប្រជាជនប៉ុន្មានភាគរយ នៅ តំបន់នេះ បានទទួលថ្នាំប្រឆាំងជំងឺវិកលចរិត ដោយឥត គិតថ្លៃ (យ៉ាងហោចណាស់ ៨០% នៃតម្លៃដែលត្រូវ គិត)?</b><br><b>Free medication</b> Overall, what % of population in the up-take area have access to free psychotropic medication (at least 80% of costs covered)?                         |                                                   |                                                          |                                                         |
| 11.8 | <b>ការព្យាបាលចិត្តសង្គម</b><br><b>Psychosocial therapies</b>                                                                                                                                                                                                                                                                             |                                                   |                                                          |                                                         |
|      | <b>តើមានការអន្តរាគមន៍ចិត្តសង្គមនៅក្នុងមណ្ឌលសុខ ភាពដែរឬទេ? (ឧ: ការប្រឹក្សា គាំទ្រយោបល់, ការ អន្តរាគមន៍សាមញ្ញសម្រាប់អ្នកញៀនសុរា, ការព្យាបាល ចិត្តសង្គមផ្សេងៗទៀត)</b><br>Are any psychosocial interventions available at the care center (for example supportive counselling, brief interventions for alcohol, other psychosocial therapy)? | <b>បាទ/ចាស</b><br><b>Yes</b>                      | <b>ទេ</b><br><b>No</b>                                   |                                                         |
|      | <b>ប្រសិនបើមាន តើការព្យាបាលប្រភេទអ្វីខ្លះ?</b><br>If any, what kind of therapies?                                                                                                                                                                                                                                                        |                                                   |                                                          |                                                         |
| 12   | <b>មណ្ឌលសុខភាពបឋម/ការបញ្ជូនសេវាកម្មផ្លូវចិត្ត</b><br><b>PHC / MENTAL HEALTH SERVICE INTERFACE</b>                                                                                                                                                                                                                                        |                                                   |                                                          |                                                         |
| 12.1 | <b>ចំនួនអ្នកជំងឺដែលបានបញ្ជូនទៅរកអ្នកឯកទេសសេវា ផ្លូវចិត្ត (ក្នុងបុគ្គលិក១នាក់/ខែ បញ្ជូនអ្នកជំងឺបានប៉ុន្មាន នាក់? Number of patients referred for specialist mental health services (per PHC worker / month)</b>                                                                                                                           |                                                   |                                                          |                                                         |

|       |                                                                                                                                                                                                                                                                                                                                                           |                                      |                                |  |
|-------|-----------------------------------------------------------------------------------------------------------------------------------------------------------------------------------------------------------------------------------------------------------------------------------------------------------------------------------------------------------|--------------------------------------|--------------------------------|--|
| 12.2  | <p>ទំនាក់ទំនងរវាងបុគ្គលិកមណ្ឌលសុខភាព និងអ្នកជំនាញសុខភាពផ្លូវចិត្តកាលពីឆ្នាំមុន (ភាពញឹកញាប់ប៉ុន្មាន?) <b>Contact between PHC workers and mental health professionals in last year (frequency)</b></p>                                                                                                                                                      |                                      |                                |  |
| 12.3  | <p><b>យន្តការបញ្ជូនសម្រាប់សុខភាពផ្លូវចិត្ត, ចូរពិពណ៌នា?</b><br/><b>Referral mechanisms for mental health, describe</b></p>                                                                                                                                                                                                                                |                                      |                                |  |
|       | <p>ដំណើរការបញ្ជូនជាផ្លូវការ<br/>(ពីមណ្ឌលសុខភាព → ការថែទាំកំរិតទី២ ទី៣)<br/>Official referral procedures<br/>(PHC -&gt; secondary / tertiary care)</p>                                                                                                                                                                                                     |                                      |                                |  |
|       | <p>ដំណើរការបញ្ជូនជាផ្លូវការ<br/>(ពីការថែទាំកំរិតទី២/ទី៣ → មណ្ឌលសុខភាពបឋម)<br/>Official referral procedures<br/>(secondary / tertiary care -&gt; PHC)</p>                                                                                                                                                                                                  |                                      |                                |  |
| 12.4  | <p>យោបល់ពីប្រព័ន្ធបញ្ជូន (ជាទ្រឹស្តី/ការអនុវត្តន៍)<br/>ឧបសគ្គនានា<br/><b>Comments on referral systems (in theory / in practice).<br/>Obstacles.</b></p>                                                                                                                                                                                                   |                                      |                                |  |
| 13    | <p><b>មណ្ឌលសុខភាពបឋម/ការបញ្ជូនទៅសហគមន៍</b><br/><b>PHC / COMMUNITY INTERFACE</b></p>                                                                                                                                                                                                                                                                       |                                      |                                |  |
| 13.1  | <p><b>ការទំនាក់ទំនងសហគមន៍ជាមួយមណ្ឌលសុខភាពបឋម</b><br/>ក្រុមស្ម័គ្រចិត្ត/អង្គការជំនឿផ្សេងៗ/គ្រូបុរាណ/ក្រុមគ្រួសារ ។ល។<br/>តើសេវាមណ្ឌលសុខភាពមានទំនាក់ទំនងយ៉ាងដូចម្តេចជាមួយពួកគាត់?<br/><b>Community linkages with PHC</b><br/>Volunteers / faith-based organisations / traditional healers / family groups, etc.<br/>How do PHC services link with them?</p> |                                      |                                |  |
| 13.3  | <p><b>តើមណ្ឌលសុខភាពមានទំនាក់ទំនងជាមួយគ្រូខ្មែរបុរាណ យ៉ាងហោចណាស់១ដង/ក្នុង១ឆ្នាំដែរឬទេ?</b><br/><b>Do the health center interact with traditional / religious healers at least once per year?</b></p>                                                                                                                                                       | <p><b>បាទ/ចាស</b><br/><b>Yes</b></p> | <p><b>ទេ</b><br/><b>No</b></p> |  |
|       | <p>ប្រសិនបើមាន តើញឹកញាប់ប៉ុណ្ណា?<br/>If Yes, how often?</p>                                                                                                                                                                                                                                                                                               |                                      |                                |  |
| 14    | <p><b>ប្រព័ន្ធគាំទ្រការថែទាំសុខភាពផ្លូវចិត្តនៅក្នុងមណ្ឌលសុខភាព</b><br/><b>SYSTEMS TO SUPPORT MENTAL HEALTH CARE IN PHC</b></p>                                                                                                                                                                                                                            |                                      |                                |  |
| 14.4  | <p><b>តើមានឧបករណ៍សម្រាប់កត់សម្គាល់/ពិនិត្យសុខភាពផ្លូវចិត្តដែរឬទេ?</b><br/><b>Mental health detection/ screening tools?</b></p>                                                                                                                                                                                                                            |                                      |                                |  |
| 14.4a | <p>តើមានគោលការណ៍ក្នុងការវាយតម្លៃ និងការព្យាបាលសម្រាប់ការថែទាំសុខភាពផ្លូវចិត្តដែរឬទេ?<br/>Any guidelines / assessment and treatment protocols for mental health care?</p>                                                                                                                                                                                  |                                      |                                |  |

|       |                                                                                                                                                                                                                                                          |                |          |  |
|-------|----------------------------------------------------------------------------------------------------------------------------------------------------------------------------------------------------------------------------------------------------------|----------------|----------|--|
| 14.4b | តើមានសៀវភៅណែនាំចេញជាផ្លូវការ ស្តីពីជំងឺផ្លូវចិត្ត នៅក្នុងមណ្ឌលសុខភាពដែរឬទេ? Are officially approved training manuals on mental disorders available in the health center?                                                                                 | បាទ/ចាស<br>Yes | ទេ<br>No |  |
| 14.4c | តើលោកអ្នកស្គាល់កញ្ចប់សកម្មភាពអប្បបរមា (MPA) ដែរឬទេ? Are you aware of MPA guidelines?                                                                                                                                                                     | បាទ/ចាស<br>Yes | ទេ<br>No |  |
| 14.5  | តើមានវិធីសាស្ត្រណា កត់សម្គាល់អ្នកជំងឺដែលបោះបង់ ការព្យាបាលដែរឬទេ? ចំនុចដែលពាក់ព័ន្ធនឹងការអនុវត្ត សុខភាពផ្លូវចិត្ត? ការចុះឈ្មោះអ្នកជំងឺតាមប្រព័ន្ធការ ណាត់ជួប?<br>Any way of detecting patients who drop out of care? Case registers? Appointment systems? |                |          |  |
| 15    | <b>ចំនុចដែលពាក់ព័ន្ធនឹងការអនុវត្តសុខភាពផ្លូវចិត្តទៅក្នុងមណ្ឌលសុខភាព</b><br><b>RELEVANT BACKGROUND TO SCALING UP MENTAL HEALTH INTO PHC</b>                                                                                                               |                |          |  |
| 15.0  | តើលោកអ្នកស្គាល់គោលការណ៍អន្តរជាតិនៃ ចន្លោះសុខ ភាពផ្លូវចិត្ត (mhGAP-IG) ដែរឬទេ?<br>Do you know what mhGAP-IG is?                                                                                                                                           | បាទ/ចាស<br>Yes | ទេ<br>No |  |
| 15.1  | តើអ្នកឯកទេសនៅមណ្ឌលសុខភាពមួយណា អាចអនុ វត្តន៍គោលការណ៍អន្តរជាតិ (ចន្លោះសុខភាពផ្លូវចិត្ត (mhGAP-IG) នោះ?<br>Which PHC professionals might deliver mhGAP-IG?                                                                                                  |                |          |  |
| 15.2  | តើមានទិន្នន័យ/ឯកសារបោះពុម្ព/របាយការណ៍ស្តី ពីបទពិសោធន៍ នៃការអនុវត្តសុខភាពផ្លូវចិត្តនៅក្នុង មណ្ឌលសុខភាពដែរឬទេ?<br>Any existing data / publications / reports on experience of implementing mental health into PHC?                                         |                |          |  |

|                             |                                                                                                                                                                                       |
|-----------------------------|---------------------------------------------------------------------------------------------------------------------------------------------------------------------------------------|
| <b>ផ្នែកទី V: សហគមន៍</b>    |                                                                                                                                                                                       |
| <b>SECTION V: COMMUNITY</b> |                                                                                                                                                                                       |
|                             | <b>ស្ថានភាពដំបូង Baseline situation</b>                                                                                                                                               |
| 1.                          | <b>កត្តាវប្បធម៌-សង្គម</b><br><b>SOCIOCULTURAL FACTORS</b>                                                                                                                             |
| 1.1                         | តើមានទំនោរស្វែងរកការជួយសម្រាប់ជំងឺផ្លូវចិត្ត នៅក្នុង តំបន់មណ្ឌលសុខភាពដែរឬទេ?<br>Is there a tendency for help-seeking for mental disorders in the up-take area of the health center?   |
| 1.2                         | តើមានវត្តអារាម/គ្រូបុរាណ នៅក្នុងតំបន់នេះឬទេ?<br>Prominent holy sites (wat) / traditional healers in the area?                                                                         |
| 1.3                         | តើប្រភេទបញ្ហាសុខភាពផ្លូវចិត្តអ្វីខ្លះ ដែលគ្រូខ្មែរ/បុរាណ ព្យាបាល? (និងដោយវិធីយ៉ាងដូចម្តេចខ្លះ?)<br>What mental health conditions do traditional / religious healers treat? (and how?) |

|     |                                                                                                                                                                                                                                                                                                                 |                    |                     |
|-----|-----------------------------------------------------------------------------------------------------------------------------------------------------------------------------------------------------------------------------------------------------------------------------------------------------------------|--------------------|---------------------|
| 1.5 | <p>តាមការប៉ាន់ប្រមាណ តើមានអ្នកដែលមានបញ្ហាផ្លូវចិត្ត ប៉ុន្មាននាក់ បានពិនិត្យដោយគ្រូខ្មែរ/បុរាណ នៅក្នុងតំបន់ នេះ? (ឧ: ក្នុង១ខែ ប៉ុន្មាននាក់?)</p> <p>Any estimates of how many persons with mental health problems are seen by traditional healers / religious healers in the up-take area? e.g. in one month</p> |                    |                     |
| 1.6 | <p><b>វប្បធម៌</b><br/>Culture</p> <p>តើសហគមន៍មានជំនឿអ្វីខ្លះ លើគំរូនៃវិបល្លាស/ បញ្ហាផ្លូវចិត្ត?</p> <p>What is known about community believes in models of mental disorders?</p>                                                                                                                                |                    |                     |
| 1.7 | <p><b>ភាពអាម៉ាស់/ការរើសអើង</b><br/>Stigma / discrimination</p> <p>តើមានភាពអាម៉ាស់/ការរើសអើងអ្វីខ្លះលើអ្នកដែលមាន វិបល្លាសផ្លូវចិត្ត នៅក្នុងសហគមន៍?</p> <p>What is known about stigma or discrimination against mentally disordered persons within the community?</p>                                             |                    |                     |
| 1.8 | <p><b>ការរំលោភបំពាន</b><br/>Abuse</p> <p>តើមានការអនុវត្តន៍រំលោភបំពានអ្វីខ្លះ? (ឧ: ការដាក់ច្រវ៉ាក់, ការចងឃុំ ។ល។) What is known of abusive practices e.g. chaining, restraining etc.?</p>                                                                                                                        |                    |                     |
| 1.9 | <p><b>បន្ទុកក្រុមគ្រួសារ</b><br/>Family burden</p> <p>តើមានបន្ទុក ការគាំទ្រអ្វីខ្លះសម្រាប់ក្រុមគ្រួសារ (សេដ្ឋកិច្ចសង្គម) ថែទាំអ្នកដែលមានវិបល្លាសផ្លូវចិត្ត?</p> <p>What is known of the burden / support (socioeconomic) for families caring for a person with mental disorder?</p>                             |                    |                     |
| 2   | <p><b>ផ្នែកមិនមែនសុខភាព-សកម្មភាពដែលជាប់ពាក់ព័ន្ធនឹងសុខភាពផ្លូវចិត្ត</b><br/>NON-HEALTH SECTOR ACTIVITIES RELEVANT TO MENTAL HEALTH</p>                                                                                                                                                                          |                    |                     |
| 2.1 | <p>តើមានអង្គការណាមួយ គាំទ្រមណ្ឌលសុខភាពលោកអ្នក ដែរឬទេ? Are there any NGO support for your center?</p>                                                                                                                                                                                                            | <p>មាន<br/>Yes</p> | <p>គ្មាន<br/>No</p> |
| 2.2 | <p>តើមានកម្មវិធីគាំទ្រជីវភាព/ការកាត់បន្ថយភាពក្រីក្រ/ ពង្រឹងសមត្ថភាពនៅក្នុងតំបន់នេះដែរឬទេ? (រាប់ទាំងស្ថាប័នរដ្ឋ, វិស័យឯកជន/អង្គការនានា) Any livelihood / poverty alleviation / empowerment programmes running in the up-take area? (public / private sectors / NGOs)</p>                                         | <p>មាន<br/>Yes</p> | <p>គ្មាន<br/>No</p> |
| 2.3 | <p><b>ក្រុមសហគមន៍</b><br/>Community groups</p> <p>មានក្រុមជួយខ្លួនឯង/ក្រុមគាំទ្រ/ក្រុមគ្រួសារដែរឬទេ? Self-help / support / family groups?</p>                                                                                                                                                                   | <p>មាន<br/>Yes</p> | <p>គ្មាន<br/>No</p> |

|     |                                                                                                                                                                                                                                                                                                                                                            |                    |                     |
|-----|------------------------------------------------------------------------------------------------------------------------------------------------------------------------------------------------------------------------------------------------------------------------------------------------------------------------------------------------------------|--------------------|---------------------|
| 2.4 | <p>តើមានការគាំទ្រសង្គមជាផ្លូវការដែរឬទេ? ឬជួយពាក់កណ្តាលសម្រាប់អ្នកដែលមានជំងឺផ្លូវចិត្តធ្ងន់ធ្ងរ និងរ៉ាំរ៉ៃ?<br/>Supported housing? Or half-way houses for persons with severe and enduring mental illness?</p>                                                                                                                                              | <p>មាន<br/>Yes</p> | <p>គ្មាន<br/>No</p> |
| 2.5 | <p>ការស្តារលទ្ធភាពឡើងវិញ / ការជាឡើងវិញ / ការបញ្ចូលក្នុងសង្គម?<br/>Rehabilitation / recovery / social inclusion?<br/>តើមានសកម្មភាពក្នុងសហគមន៍ ដើម្បីគាំទ្រការជាឡើងវិញ និងសមារហាកម្មឡើងវិញ សម្រាប់អ្នកដែលមានជំងឺផ្លូវចិត្តដែរឬទេ?<br/>Any community activities to support the recovery and reintegration of persons who have experienced mental illness?</p> | <p>មាន<br/>Yes</p> | <p>គ្មាន<br/>No</p> |
| 3.  | <p>ការលើកកម្ពស់ / ការការពារ / ការផ្សព្វផ្សាយបង្កើនការយល់ដឹង<br/>PROMOTION / PREVENTION / AWARENESS-RAISING</p>                                                                                                                                                                                                                                             |                    |                     |
| 3.1 | <p>តើមានសកម្មភាពផ្សព្វផ្សាយឲ្យមានការយល់ដឹង/ប្រឆាំងភាពអាម៉ាស់ នៅក្នុងសហគមន៍ដែរឬទេ? ធ្វើឡើងដោយអ្នកណា?, នៅទីកន្លែងណា?, ញឹកញាប់ប៉ុណ្ណា?<br/>Any community awareness-raising / anti-stigma activities? Who, where, how often?</p>                                                                                                                               | <p>មាន<br/>Yes</p> | <p>គ្មាន<br/>No</p> |
| 3.2 | <p>តើមានសកម្មភាពការលើកកម្ពស់សុខភាពផ្លូវចិត្ត/ការការពារវិបល្លាសផ្លូវចិត្ត នៅក្នុងតំបន់នេះដែរឬទេ? ធ្វើឡើងដោយអ្នកណា? នៅទីកន្លែងណា? ញឹកញាប់ប៉ុណ្ណា?<br/>Any mental health promotion / mental disorder prevention activities within the area? Who, where, how often?</p>                                                                                        | <p>មាន<br/>Yes</p> | <p>គ្មាន<br/>No</p> |

សូមអរគុណសម្រាប់បំពេញនូវកិរិយាសំនួរនេះ!  
(Thank you!)
